# Supplementary material for: miR-99a regulates CD4+ T cell differentiation and attenuates experimental autoimmune encephalomyelitis by mTOR-mediated glycolysis
Source: PubMed Central journal article supplement — Mol Ther Nucleic Acids. 2021 Jul 21;26:1173–85. doi: 10.1016/j.omtn.2021.07.010 (PMC8598972; doi:10.1016/j.omtn.2021.07.010), 2021-07-21
Supplement: mmc1.pdf [file mmc1.pdf]

**Supplemental information**

**miR-99a regulates CD4<sup>+</sup> T cell differentiation  
and attenuates experimental autoimmune  
encephalomyelitis by mTOR-mediated glycolysis**

**Yuting Gu, Hong Zhou, Hongshuang Yu, Wanlin Yang, Bei Wang, Fengtao Qian, Yiji Cheng, Shan He, Xiaonan Zhao, Linqiao Zhu, Yanyun Zhang, Min Jin, and Eryi Lu**

**Supplementary Table 1. The sequences of primers.**

| Gene          |                  | Sequence                |
|---------------|------------------|-------------------------|
| <i>Actb</i>   | Primer (forward) | TTCCAGCCTTCCTTCTTGGG    |
|               | Primer (reverse) | TGTTGGCATAGAGGTCTTTACGG |
| <i>Ifng</i>   | Primer (forward) | ATGAACGCTACACACTGCATC   |
|               | Primer (reverse) | CCATCCTTTTGCCAGTTCCTC   |
| <i>Tgfb</i>   | Primer (forward) | CTTCGACGTGACAGACGCT     |
|               | Primer (reverse) | GCAGGGGCAGTGTAAACTTATT  |
| <i>Il17a</i>  | Primer (forward) | AGCGTGTCCAAACACTGAG     |
|               | Primer (reverse) | CGCCAAGGGAGTTAAAGACTT   |
| <i>Hk2</i>    | Primer (forward) | TGATCGCCTGCTTATTCACGG   |
|               | Primer (reverse) | AACCGCCTAGAAATCTCCAGA   |
| <i>Pgam1</i>  | Primer (forward) | TCTGTGCAGAAGAGAGCAATCC  |
|               | Primer (reverse) | CTGTCAGACCGCCATAGTGT    |
| <i>Slc2a3</i> | Primer (forward) | ATGGGGACAACGAAGGTGAC    |
|               | Primer (reverse) | GTCTCAGGTGCATTGATGACTC  |
| <i>Ldha</i>   | Primer (forward) | TGTCTCCAGCAAAGACTACTGT  |
|               | Primer (reverse) | GACTGTACTTGACAATGTTGGGA |
| <i>Foxp3</i>  | Primer (forward) | CACCTATGCCACCCTTATCCG   |
|               | Primer (reverse) | CATGCGAGTAAACCAATGGTAGA |
| <i>Pdcd1</i>  | Primer (forward) | TGGGGCCTAAGCCTATGTCT    |
|               | Primer (reverse) | CTCCCAAGGGTGGCTTTAGG    |
| <i>Icos</i>   | Primer (forward) | TGCTCCTGGCAGACATGAAG    |
|               | Primer (reverse) | TTGGTGAGTTCGCAGAGGAC    |
| <i>Tbx21</i>  | Primer (forward) | AACCGCTTATATGTCCACCCA   |
|               | Primer (reverse) | CTTGTTGTTGGTGAGCTTTAGC  |
| <i>Mtor</i>   | Primer (forward) | ATGCTATGGAGGTTACGGGTCTG |
|               | Primer (reverse) | CCGCTTATTGCCTTTGGTATTTG |

## Supplementary Figures

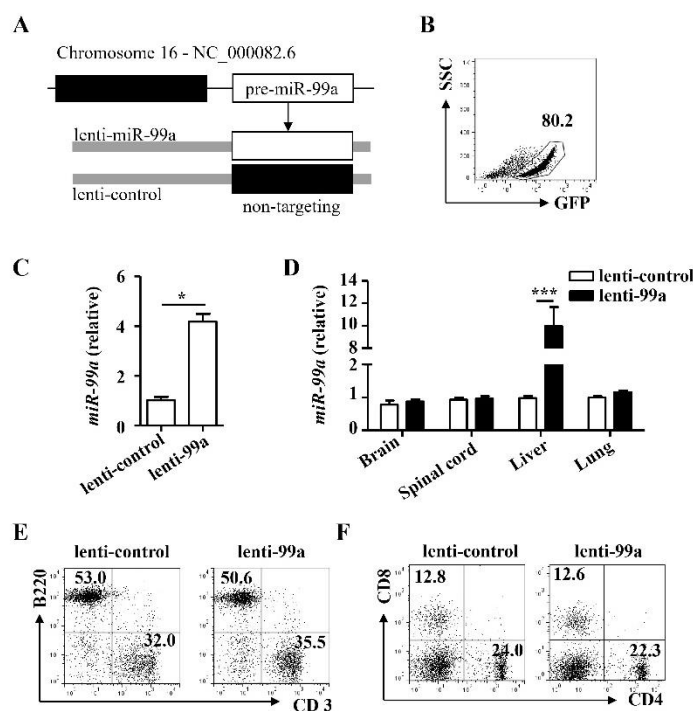

**Figure S1. Overexpression of miR-99a in CD4<sup>+</sup> T cells and mice through by lentivirus infection.** (A) miR-99a was encoded by pre-miR-99a which located after the 2810055G20Rik gene. Pre-miR-99a or an artificial sequence targeting none of the known proteins was cloned into a lentivirus vector to overexpress miR-99a or miR-control. (B-C) *In vitro* infection with lentiviruses led to stable exogenous gene expression with over 80% efficiency in purified CD4<sup>+</sup> T cells as indicated by GFP reporter fluorescence. The expression of miR-99a was analyzed by real-time PCR in infected CD4<sup>+</sup> T cells (n=5). (D) Real-time PCR analysis of miR-99a expression in the brain, spinal cord, liver and lung of the mice infected with lenti-99a or lenti-control (n=5). (E-F) Analysis of CD3e and B220 for determining total T and B lymphocytes, as well as CD4 and CD8 for identifying T helper cells and cytotoxic T cells in the spleen of mice infected with lenti-99a or lenti-control. The values are shown as the means  $\pm$  S.E.M. \*P < 0.05, \*\*\*P < 0.001 (Mann-Whitney U test and two-way ANOVA).

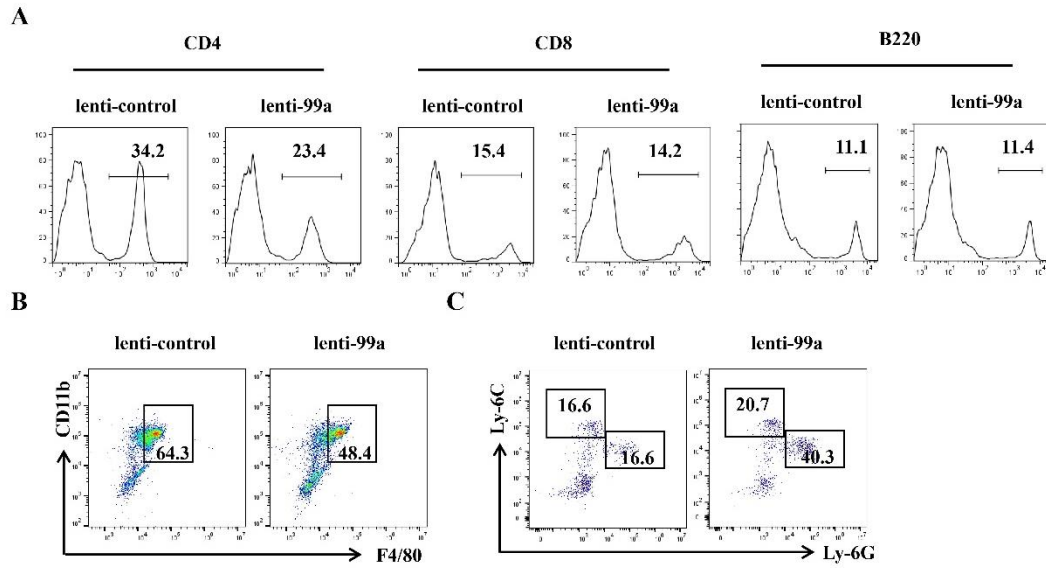

**Figure S2. miR-99a suppresses immune cell infiltration in the CNS of the EAE mice.** Flow cytometry of CD4<sup>+</sup> T cells, CD8<sup>+</sup> T cells, B cells (B220), macrophages (CD11b<sup>+</sup>F4/80<sup>+</sup>), M-MDSCs (CD11b<sup>+</sup>Ly-6C<sup>high</sup>Ly-6G<sup>low</sup>) and PMN-MDSCs, (CD11b<sup>+</sup>Ly-6C<sup>low</sup>Ly-6G<sup>high</sup>) obtained from the CNS of lenti-99a or lenti-control EAE mice(14 days after immunization).

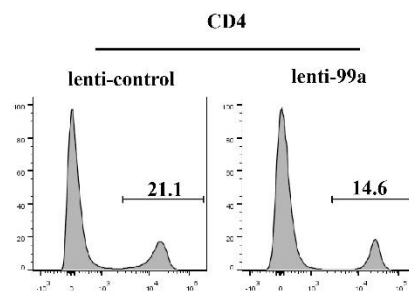

**Figure S3. miR-99a suppresses CD4<sup>+</sup> T cells in the DLNs of the EAE mice.** Flow cytometry of CD4<sup>+</sup> T cells obtained from the DLNs of the lenti-99a or lenti-control EAE mice (14 days after immunization).

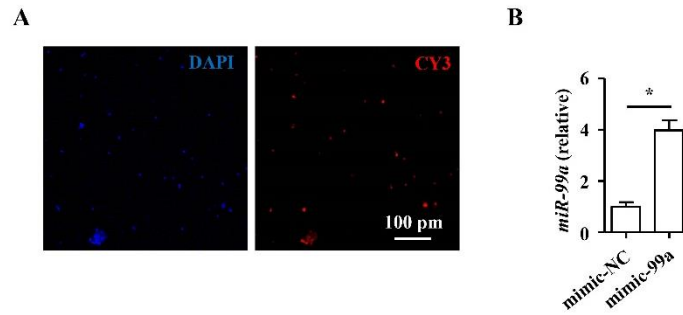

**Figure S4. Overexpression of miR-99a in CD4<sup>+</sup> T cells by nucleofection.** Naive CD4<sup>+</sup> T cells were nucleofected with miRNA mimic control (mimic-NC) or miRNA mimic miR-99a (mimic-99a) labeled by CY3. (A) Cells were stained with DAPI for 3 hours after nucleofection, and fluorescence images are shown. Scale bar, 100 μm. (B) Cells were activated by anti-CD3/CD28 antibodies 3 hours after nucleofection. miR-99a expression was detected by real-time PCR within 48 hours of nucleofection (n=4). The values are shown as the means ± S.E.M. \*P < 0.05 (Mann-Whitney U test).

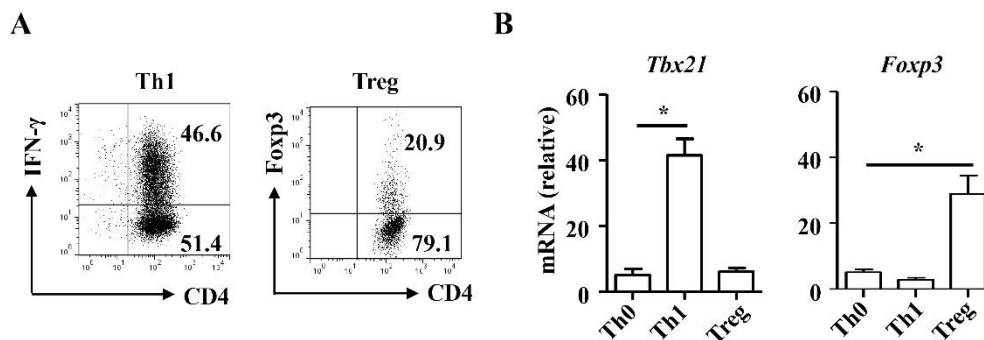

**Figure S5. *In vitro* differentiation system for Th1 and Treg cells.** Naive CD4<sup>+</sup> T cells were freshly isolated and cultured for 4 days under Th0, Th1 and Treg differentiation conditions. (A) Crucial lineage-specific cytokines were detected by flow cytometry. (B) Transcription factors were analyzed by real-time PCR (n = 4). The values are shown as the means ± S.E.M. \*P < 0.05 (one-way ANOVA).
